# Supplementary material for: Functional loss of ketogenesis in odontocete cetaceans
Source: Oxford University Press journal article supplement (doi:10.1242/jeb.243062), 2021-10-04
Supplement: jeb243062supp.pdf [file jeb243062supp.pdf]

**Table S1.**

[Click here to download Table S1](#)

**Table S2.**

[Click here to download Table S2](#)

**Table S3.**

[Click here to download Table S3](#)
